# Supplementary material for: Peering through zebrafish to understand inherited bone marrow failure syndromes
Source: PubMed Central journal article supplement — Haematologica. 2018 Dec 20;104(1):13–24. doi: 10.3324/haematol.2018.196105 (PMC6312012; doi:10.3324/haematol.2018.196105), 2019-01
Supplement: 2018_196105-Disclosures_and_Contributions.pdf [file 2018_196105-Disclosures_and_Contributions.pdf]

Haematologica  
HAEMATOL/2018/196105  
Version 3

Peering through zebrafish to understand inherited bone marrow failure syndromes

Usua Oyarbide, Jacek Topczewski, and Seth J. Corey

Disclosures: Usua Oyarbide, Jacek Topczewski, and Seth Corey declare no conflicts of interest. Grant support is provided by NIH, DOD, LLS, and private non-profit foundations.

Contributions: The manuscript was written by U.O, J.T., and S.J.C.
