# Supplementary material for: Peering through zebrafish to understand inherited bone marrow failure syndromes
Source: PubMed Central journal article supplement — Haematologica. 2018 Dec 20;104(1):13–24. doi: 10.3324/haematol.2018.196105 (PMC6312012; doi:10.3324/haematol.2018.196105), 2019-01

# Zebrafish as a model organism for inherited bone marrow failure syndromes

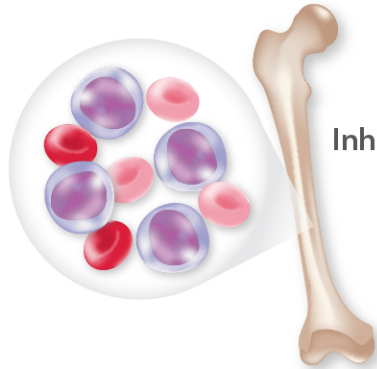

**Inherited bone marrow failure syndromes**

Model organism

**Zebrafish**

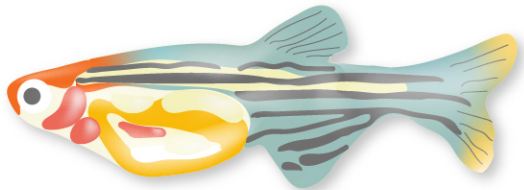

- Fanconi anemia
- Diamond-Blackfan anemia
- Dyskeratosis congenita
- Shwachman-Diamond syndrome
- Congenital amegakaryocytic thrombocytopenia
- Severe congenital neutropenia

## Advantages

- Rapid development of transparent embryos
- High fecundity → large numbers of mutant and normal siblings
- Large collection of mutant and transgenic lines

## Developmental hematopoiesis in zebrafish

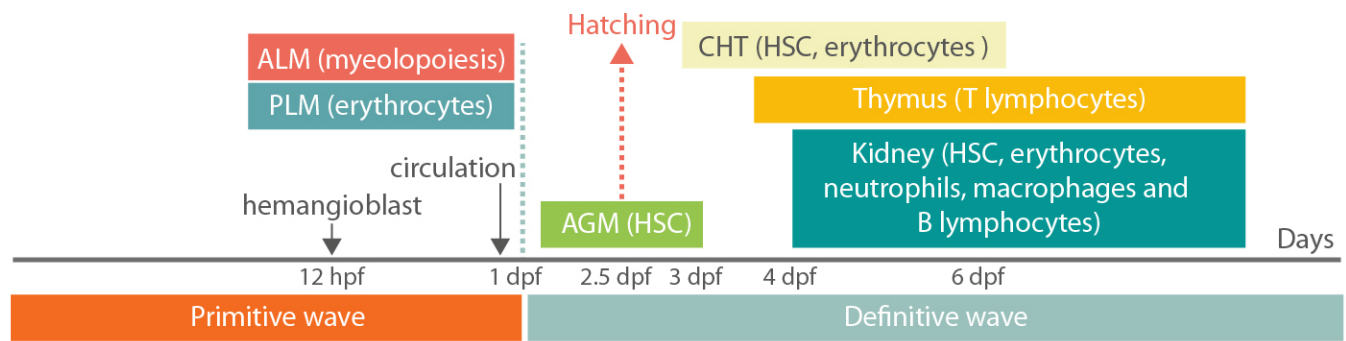

Supplement: HAEMATOL-2018-196105v3-Oyarbide-01.pdf [file HAEMATOL-2018-196105v3-Oyarbide-01.pdf]
